# Supplementary material for: The Emerging Evidence for a Protective Role of Fucoidan from Laminaria japonica in Chronic Kidney Disease-Triggered Cognitive Dysfunction
Source: MDPI journal article supplement (doi:10.3390/md20040258), 2022-04-07
Supplement: s1 [file s1]

## Supplementary materials

### The Emerging Evidence for A Protective Role of Fucoidan from *Laminaria japonica* in Chronic Kidney Disease-Triggered Cognitive Dysfunction

Zhihui Ma <sup>1,†</sup>, Zhiyou Yang <sup>1,2,†,\*</sup>, Xinyue Feng <sup>1</sup>, Jiahang Deng <sup>1</sup>, Chuantong He <sup>1</sup>, Rui Li<sup>1</sup>,  
Yuntao Zhao <sup>1</sup>, Yuewei Ge <sup>3</sup>, Yongping Zhang <sup>1</sup>, Cai Song <sup>1</sup>, Saiyi Zhong <sup>1,2</sup>

- <sup>1</sup> Guangdong Provincial Key Laboratory of Aquatic Product Processing and Safety, Guangdong Province Engineering Laboratory for Marine Biological Products, Guangdong Provincial Engineering Technology Research Center of Seafood, Key Laboratory of Advanced Processing of Aquatic Product of Guangdong Higher Education Institution, College of Food Science and Technology, Guangdong Ocean University, Zhanjiang 524088, China; mazhihui@stu.gdou.edu.cn (Z.M.); 2112003030@stu.gdou.edu.cn (X.F.); 2112003070@stu.gdou.edu.cn (J.D.); 2112103046@stu.gdou.edu.cn (C.H.); lirui@gdou.edu.cn (R.L.); zhaoyt@gdou.edu.cn (Y.Z.); zhangyp@gdou.edu.cn (Y.Z.); cai.song@dal.ca (C.S.); zhongsy@gdou.edu.cn (S.Z.)
- <sup>2</sup> Collaborative Innovation Center of Seafood Deep Processing, Dalian Polytechnic University, Dalian 116034, China
- <sup>3</sup> Key Laboratory of Digital Quality Evaluation of Chinese Materia Medica of State Administration of TCM, Guangdong Pharmaceutical University, Guangzhou 510006, China; geyuewei@gdpu.edu.cn (Y.G.)

\*Correspondence: zyyang@gdou.edu.cn (Z.Y.); Tel.: +86-759-2396046

†These authors contributed equally to this work.

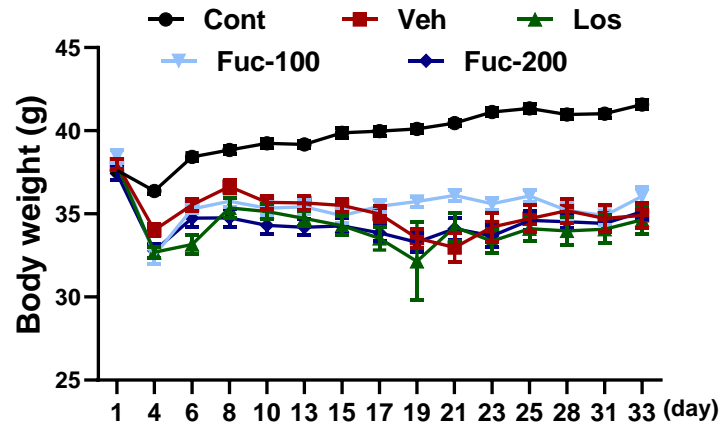

**Figure S1.** Effects of fucoidan on body weight in adenine-induced CKD mice. ICR mice (male, 8-week-old) were orally co-administered with fucoidan (Fuc), Losartan (Los) or vehicle (saline), and adenine (0.25% contained diets) for 33 days.

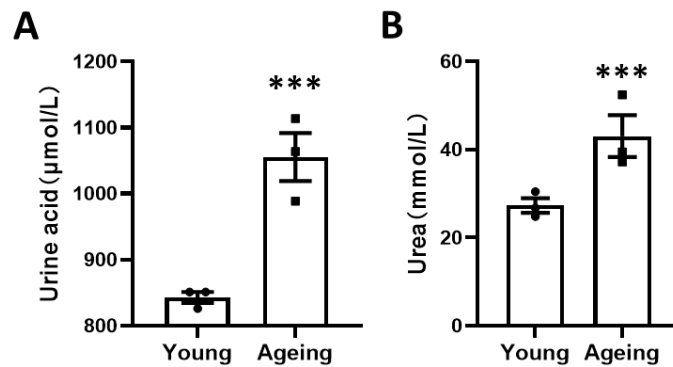

**Figure S2.** Effects of fucoidan on renal indexes in ageing renal failure mice. The urine was collected from young C57BL/6 mice (male, 3-month-old) and old C57BL/6 mice (male, 24-month-old), and were applied for ELISA analysis using urine acid (A) and urea (B) kits.

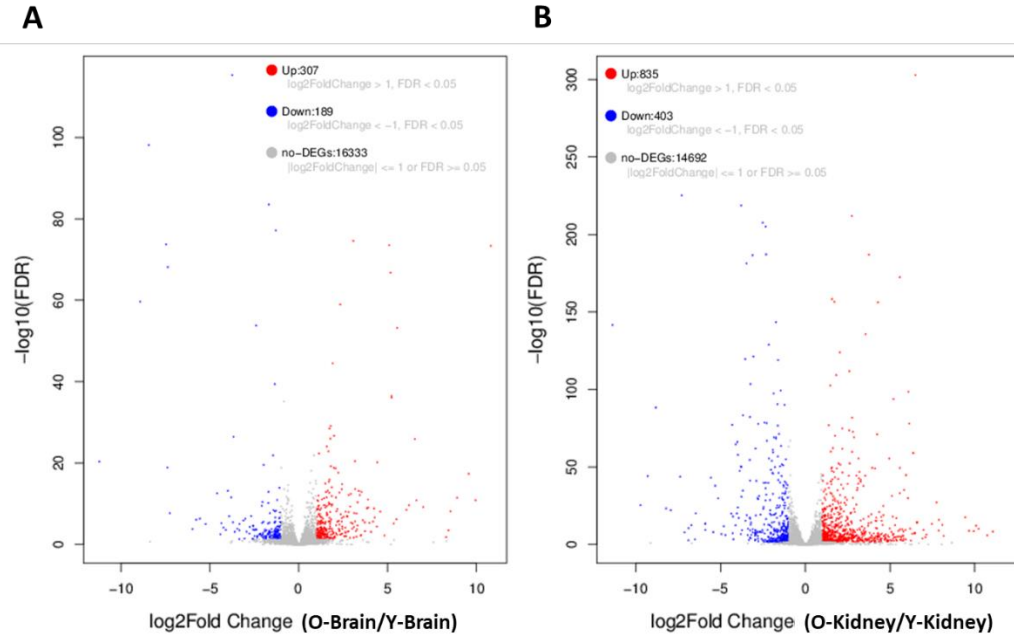

**Figure S3.** Volcano map of differential genes in the brain and kidney of CKD mice. The aged-CKD mice (male, 24-month-old) and young mice (male, 3-month-old) were sacrificed, and the brain and kidney were dissected after perfusion with saline. The tissues were then subjected to RNA-seq analysis. (A) Differential genes expressed in the brain between aged-CKD and young mice. (B) Differential genes expressed in the kidney between aged-CKD and young mice. The data are expressed as mean  $\pm$  SEM (n = 3).

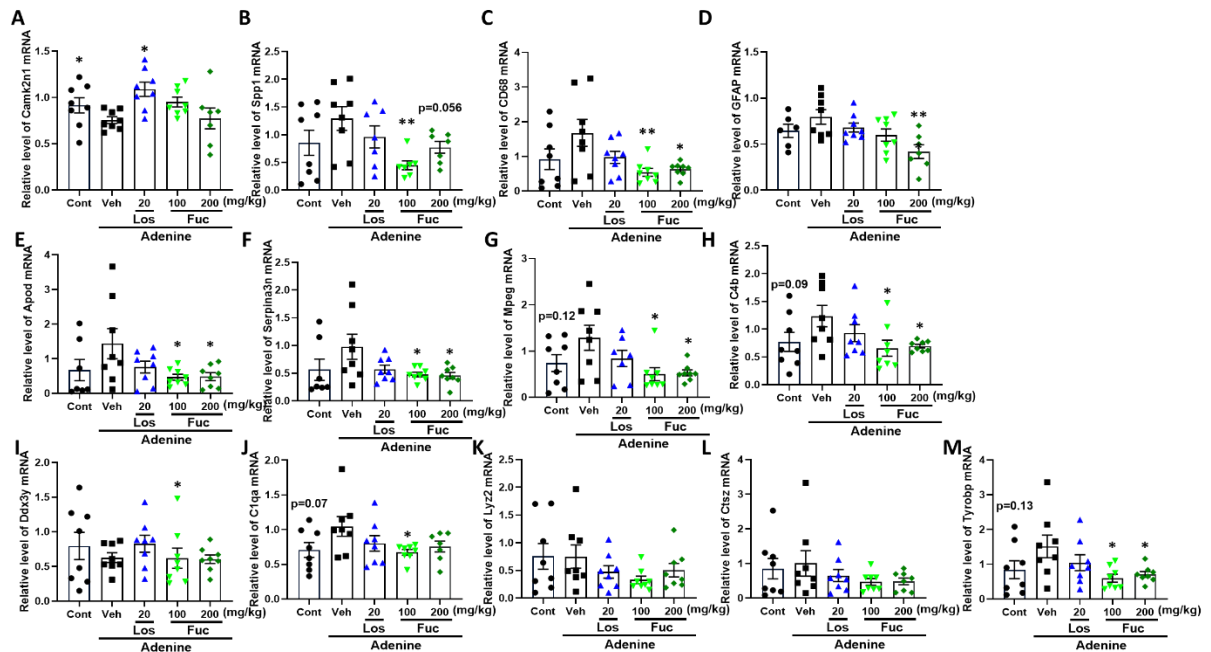

**Figure S4.** Effects of fucoidan (Fuc) on adenine-induced mRNA expression of differential genes in hippocampus. Camk2n1 (A), Spp1 (B), CD68 (C), GFAP (D), Apod (E), Serpina3n (F), Mpeg (G), C4b (H), Ddx3y (I), C1qa (J), Lyz2 (K), CTSZ (L), and Tyrobp (M) were determined by mRNA qPCR analysis. \*p < 0.05, \*\*p < 0.01 vs. vehicle group (Veh), one-way ANOVA post hoc Dunnett's test.

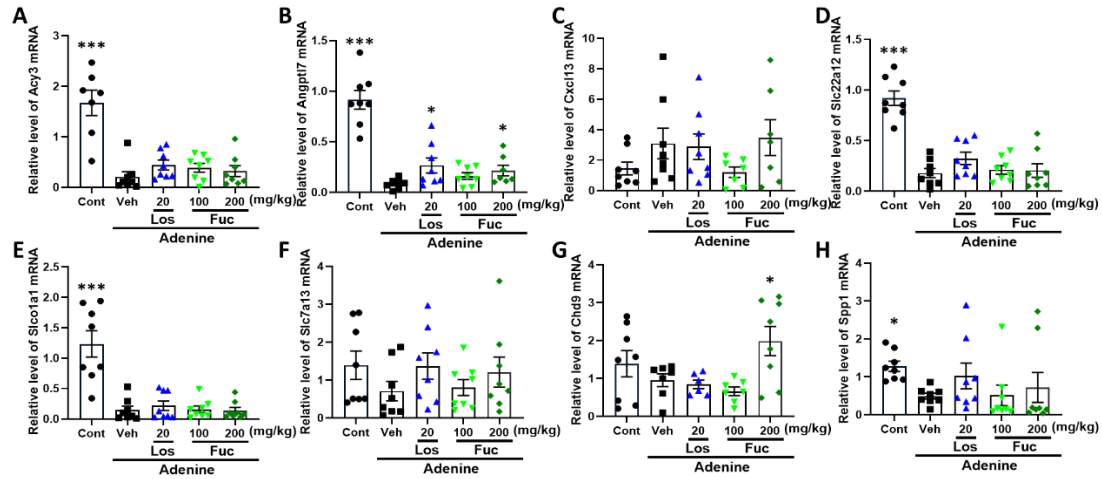

**Figure S5.** Effects of fucoidan (Fuc) on adenine-induced mRNA expression of differential genes in kidney. *Acy3* (A), *Angptl7* (B), *Cxcl13* (C), *Slc22a12* (D), *Slco1a1* (E), *Slc7a13* (F), *Chd9* (G), and *Spp1* (H) were determined by mRNA qPCR analysis. \* $p < 0.05$ , \*\*\* $p < 0.001$  vs. vehicle group (Veh), one-way ANOVA post hoc Dunnett's test.

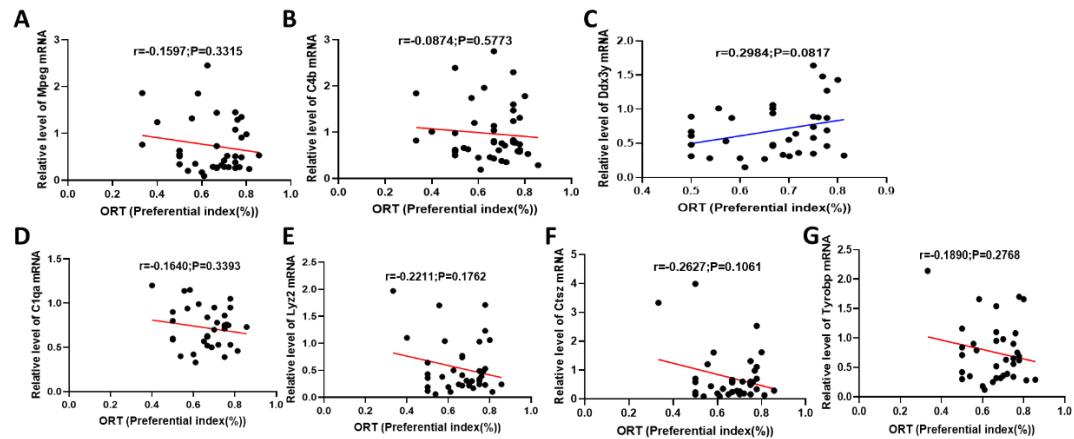

**Figure S6.** Pearson correlation analysis between hippocampus gene expression and cognitive behavior. The mRNA qPCR analysis of *Mpeg* (A), *C4b* (B), *Ddx3y* (C), *C1qa* (D), *Lyz2* (E), *Ctsz* (F), and *Tyrobp* (G) were performed.

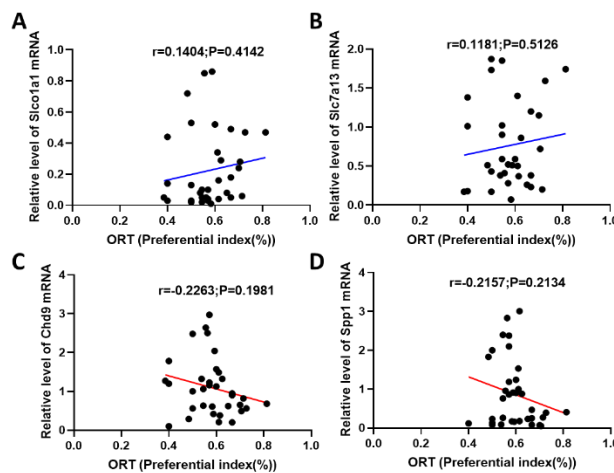

**Figure S7.** Pearson correlation analysis between kidney gene expression and cognitive behavior. The mRNA qPCR analysis of *Slco1a1* (A), *Slc7a13* (B), *Chd9* (C), and *Spp1* (D) were performed.

**Table S1.** Design of amplification primers for genes related to oxidative damage and inflammatory factors in epigenetic kidney and hippocampus.

| Primer         | Sequence (5' to 3') F     | Sequence (5' to 3') R   |
|----------------|---------------------------|-------------------------|
| GSK-3 $\beta$  | ATGGCAGCAAGGTAACCACAG     | TCTCGGTTCTTAAATCGCTTGTC |
| Nrf2           | TCCGCTGCCATCAGTCAGTC      | ATTGTGCCTTCAGCGTGCTTC   |
| HO-1           | CCCAAAACTGGCCTGTAAAA      | CGTGGTCAGTCAACATGGAT    |
| NQO1           | AGGATGGGAGGTACTCGAATC     | AGGCGTCCTTCCTTATATGCTA  |
| TNF $\alpha$   | GACGTGGAAGTGGCAGAAGAG     | TTGGTGGTTTGTGAGTGTGAG   |
| IL1 $\beta$    | GCAACTGTTCTGAACTCAACT     | ATCTTTTGGGGTCCGTCAACT   |
| IL4            | GGTCTCAACCCCCAGCTAGT      | GCCGATGATCTCTCTCAAGTGAT |
| iNOS           | CTGCAGCACTTGCATCAGGAACCTG | GAGTAGCCTGTGTGCACCTGGAA |
| Arg1           | TAACCTTGGCTTGCTTCGGAACCTC | TGGCGCATTACAGTCACCTTAGG |
| CD206          | TCTTTGCCTTTCCAGTCTCC      | TGACACCCAGCGGAATTTTC    |
| TGF $\beta$    | CTCCCGTGGCTTCTAGTGC       | GCCTTAGTTTGGACAGGATCTG  |
| Camk2n1        | GGAGCAAGCGCGTTGTTATT      | CAGCCCGCCACTCTTCTTAT    |
| Spp1           | CCTTGCTTGGGTTTGCAGTC      | TGGTCGTAGTTAGTCCCTCAGA  |
| Cd68           | TCAGAGCCCGAGTACAGTCT      | GCCATGAATGTCCACTGTGC    |
| GFAP           | GCTGCGTATAGACAGGAGGC      | TCTCCTCCTCCAGCGATTCA    |
| Apod           | TATCAAAGGGCAAGGGCCTG      | GCTCACTGTCAGTTTCTCTCAG  |
| Serpina3n      | ACCCAGGGGATGATCAAGGA      | GGCACCTTCCATTTGGCTTT    |
| Mpeg1          | AGCCTTCTGACAGAGTCTTGTT    | CCCGTTTCTCCAAGAGGCTT    |
| C4b            | GCCCCATGTCCTGTTGTA        | AGAGCACTTGTGATCAGGGC    |
| Ddx3y          | GGGTCTGTGATAAGGACAGTTCA   | CACGACCACCAATACCATCATAG |
| C1qa           | TGCTGACCATGACCCTAGTAT     | AGCAGCTCCTGGCTCC        |
| Lyz2           | TGAACGTTGTGAGTTTGCCAG     | AGCTAAACACACCCAGTCGG    |
| Ctsz           | GTGATTACGGCTCCCTGTCC      | GCCATTATCCCGCAGCTGAT    |
| Tyrobp         | GTCGCCTTATCAGGAGCTTCA     | GGATCCGGGCATCAGGC       |
| Acy3           | GCTCGTACCAGCAGCTTAGG      | TCAAGACACCAGCAGCCAAA    |
| Slc22a12       | GAGGAACCAAGCAGGGACAA      | CCAAAGGCAAACCAGCACAG    |
| Cxcl13         | CTCTCCAGGCCACGGTATTC      | TGATGTTTAGACCGACAACAGT  |
| Angptl7        | GCCCTGAGCTAGAGGTGTTC      | CCAGAAGTCACCTCGGATGC    |
| Slco1a1        | ACAACAAGCTGCAGTACTTTTTA   | TCAGATTTGACACACCTCAGAAG |
| Slc7a13        | GGACTGCCTCTGGTAACTGTC     | AGAGCAACAGCATCTGAAGAG   |
| Chd9           | TGTTGTAAACAGTCTGGGTTTC    | GCCAGCAGGAACCGC         |
| $\beta$ -actin | CATCCGTAAAGACCTCTATGCCAAC | ATGGAGCCACCGATCCACA     |
